# Supplementary material for: Talc-like hybrids: influence of the synthesis
Source: Royal Society of Chemistry journal article supplement (doi:10.1039/c9nj06298j), 2020-01-01
Supplement: c9nj06298j1.pdf [file c9nj06298j1.pdf]

## Supporting information

# Talc-like hybrids: influence of the synthesis parameters on the polycondensation degree, crystallinity and thermal stability

Marion BRUNEAU<sup>1,2,3</sup>, Jocelyne BRENDLE\*<sup>1,2</sup>, Simona BENNICI\*<sup>1,2</sup>, Lionel LIMOUSY<sup>1,2</sup>, Sylvain PLUCHON<sup>3</sup>

<sup>1</sup>Université de Haute-alsace, CNRS, IS2M UMR 7361, F-68100 Mulhouse, France

<sup>2</sup>Université de Strasbourg, France

<sup>3</sup>Agro Innovation International, 35400 Saint Malo, France

\* Corresponding authors at: Université de Haute-Alsace, CNRS, IS2M UMR 7361, F-68100 Mulhouse, France ; Email: [jocelyne.brendle@uha.fr](mailto:jocelyne.brendle@uha.fr)

### I. XRD results

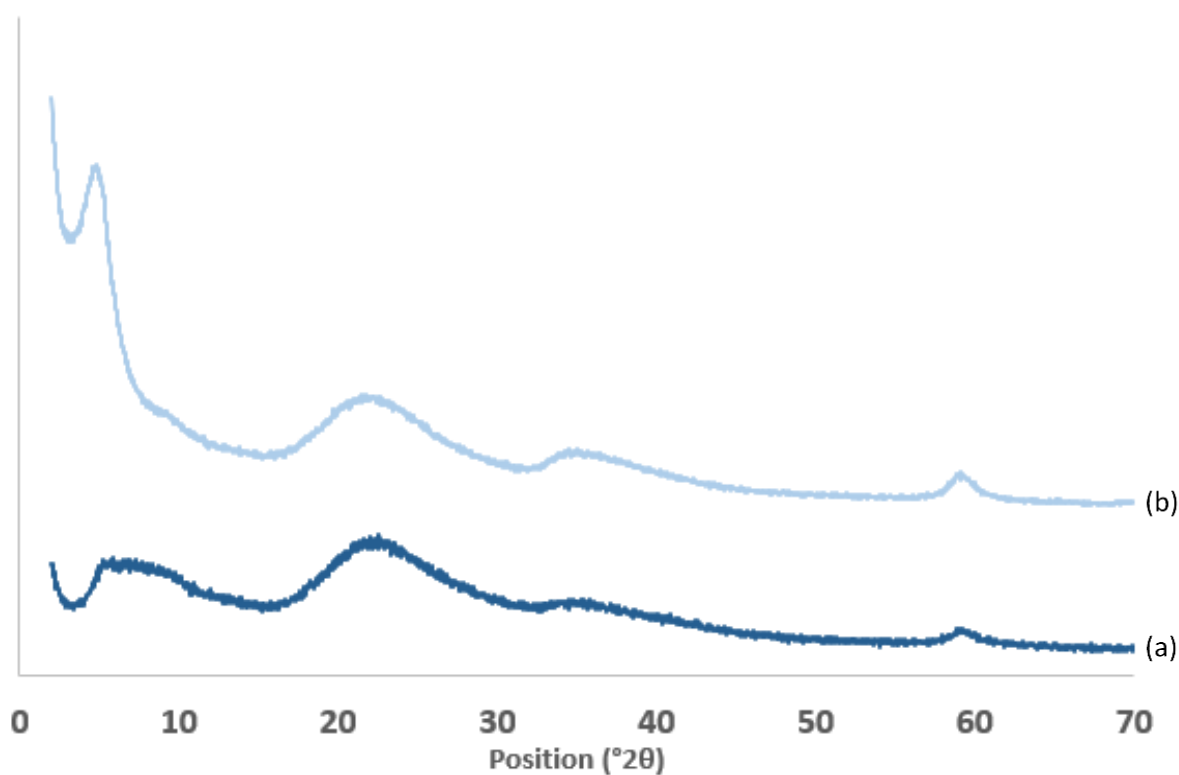

Figure A : XRD patterns of the talc-like hybrids synthesized in phenoxy-2-propanol (a) and absolute ethanol (b)

In figure A, the XRD pattern of the hybrids synthesized in phenoxy-2-propanol and absolute ethanol shows the five main reflections typical of talc-like hybrids. It can be noticed in the first diffractogramme (a) that the intensity of the (001) reflection is lower and the thickness is higher than in the second one (b), indication of a low degree of crystallinity for the hybrid synthesized in presence of phenoxy-2-propanol.

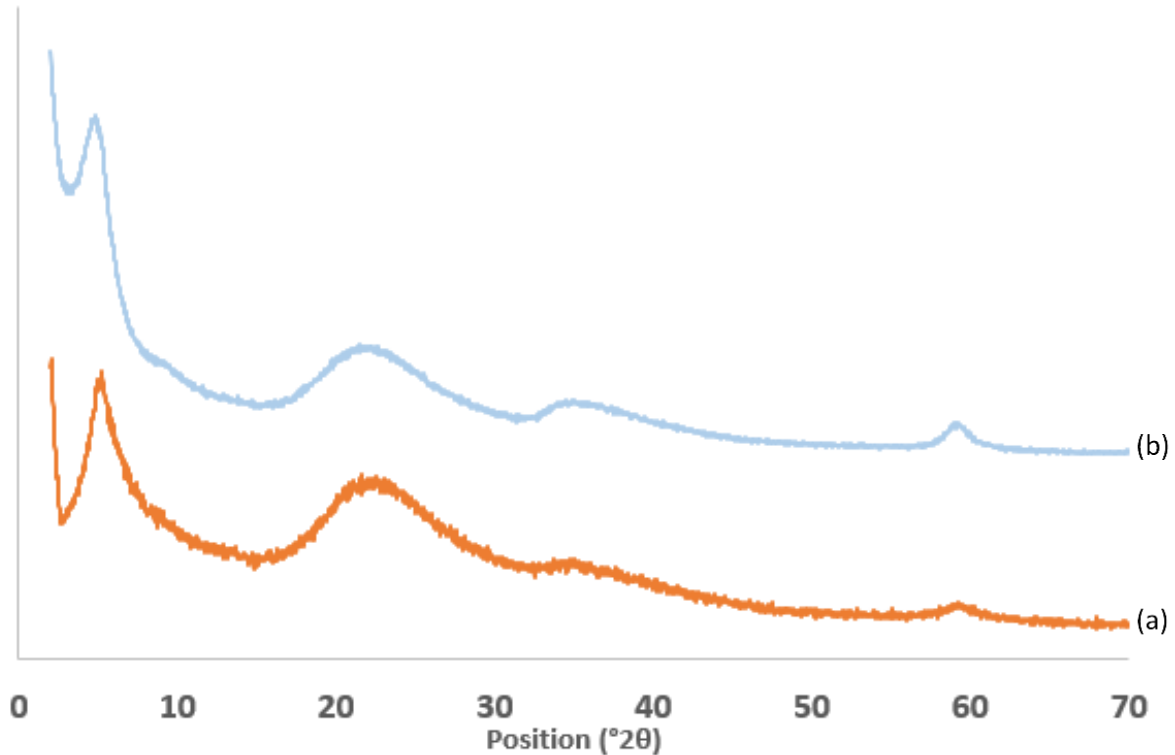

Figure B : XRD patterns of the talc-like hybrids synthesized during 1 day (a) and 5 days (b)

In figure B, the XRD pattern of the hybrid synthesized during 5 days presents a more intense (001) reflection than the pattern of the hybrid synthesized during one day that indicates a higher degree of crystallinity. This phenomenon can be explained by a longer hydrolysis-condensation process time which favours the formation of talc-like hybrids.

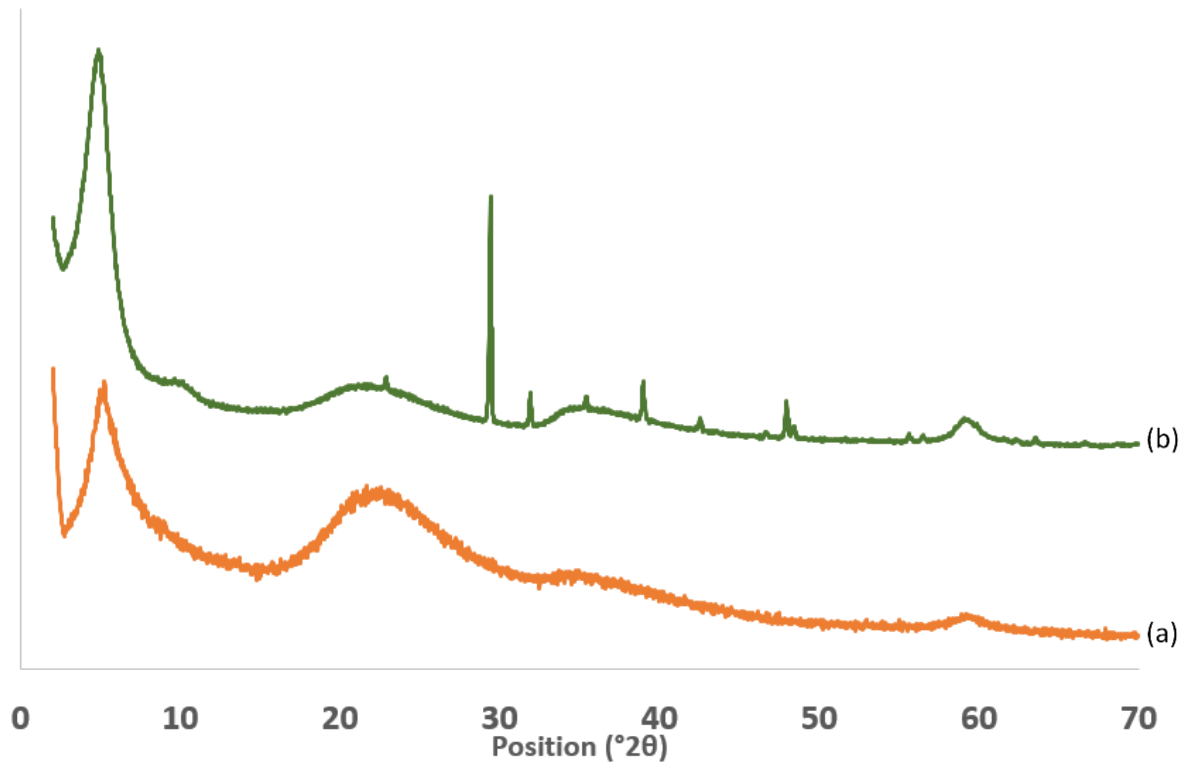

Figure C : XRD patterns of the talc-like hybrids synthesized in absence of NaOH (a) and in presence of NaOH (b)

In figure C, the XRD pattern of the hybrid synthesized in presence of sodium hydroxide presents a more intense (001) reflection than the XRD pattern of the hybrid synthesized in absence of NaOH and that indicate a higher degree of crystallinity for this hybrid compare to the other. This phenomenon can be explained by the enhanced condensation process due to the high pH of the synthesis medium. The narrow reflections that can be observed in the XRD pattern of the hybrid synthesized in presence of NaOH are attributed to sodium nitrate, a by-product of the reaction between magnesium nitrate and sodium hydroxide.

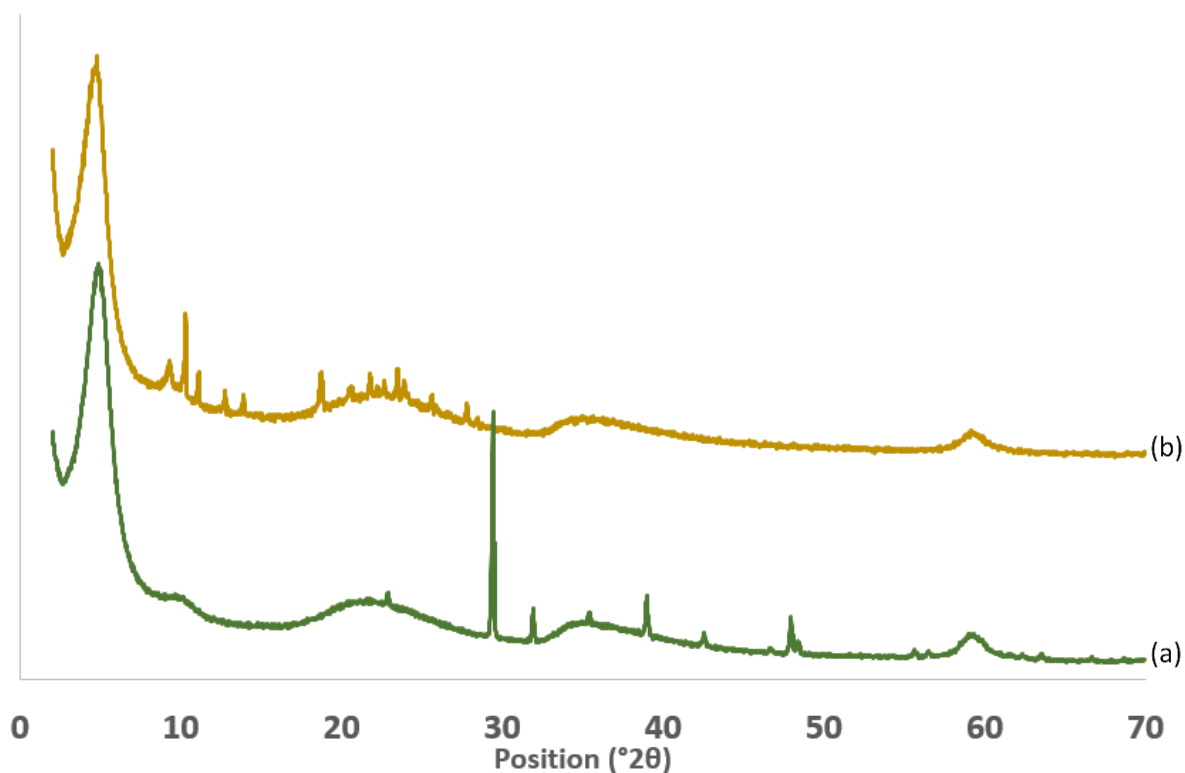

Figure D : XRD patterns of the talc-like hybrids synthesized in presence of NaOH (a) or TPAOH (b)

In figure D, the two XRD patterns are very similar indicating that the nature of the base used in the synthesis medium has no influence on the crystallinity of the hybrids. The narrow reflections that can be observed in the XRD pattern of the hybrid synthesized in presence of NaOH are attributed to sodium nitrate, a by-product of the reaction between magnesium nitrate and sodium hydroxide. The narrow peaks observed in the XRD pattern of the hybrid synthesized in presence of TPAOH are not identified, but can be reasonably attributed to an impurity, formed thanks to the addition of TPAOH.

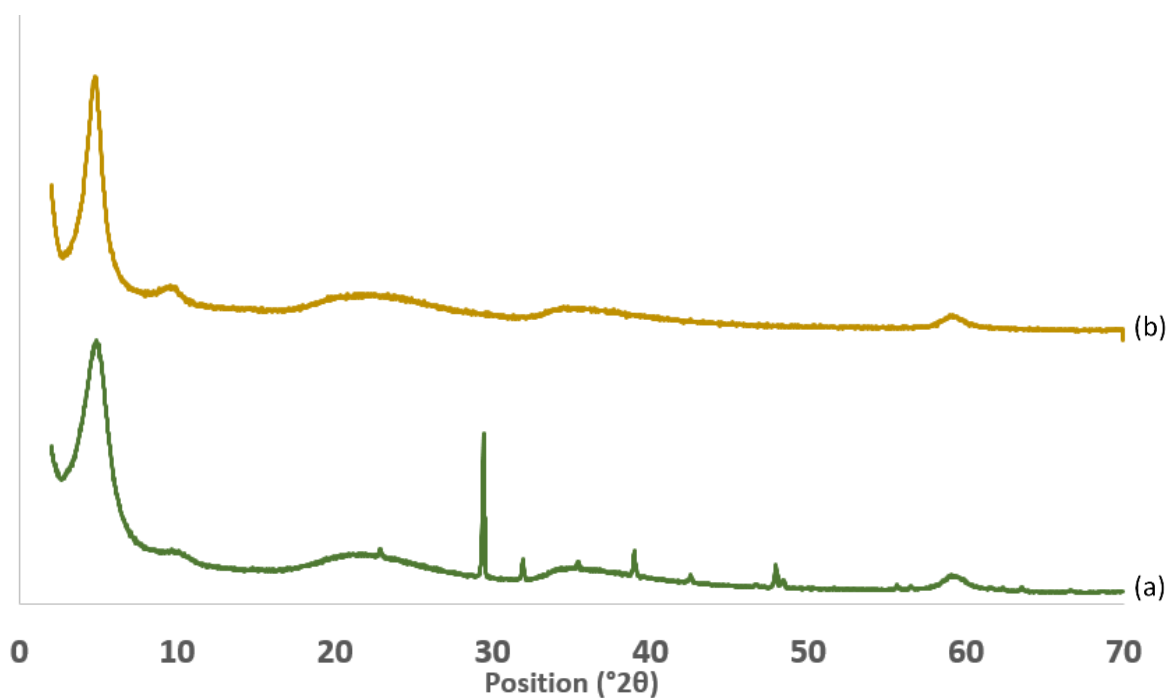

Figure E : XRD patterns of the talc-like hybrids synthesized in presence of NaOH (a) or water (b)

In figure E, the two XRD patterns are very similar indicating that the presence of sodium hydroxide or water has the same influence on the crystallinity of the hybrids. The narrow reflections that can be observed in the XRD pattern of the hybrid synthesized in presence of NaOH are attributed to sodium nitrate, a by-product produced during the reaction between magnesium nitrate and sodium hydroxide.

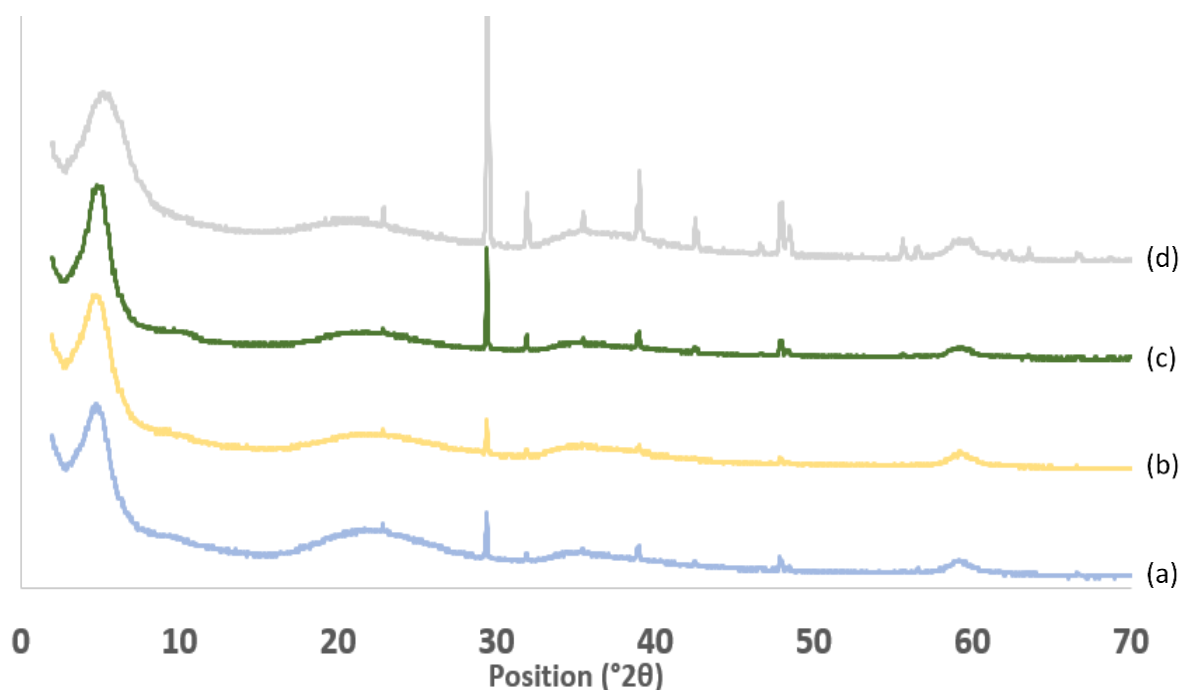

Figure F : XRD patterns of the talc-like hybrids synthesized at different pH : pH=9, 4 mL of NaOH 1 M (a); pH=9, 8 mL of NaOH 0.5 M (b), pH=10, 8 mL of NaOH 1 M (c) and pH=13, 8 mL of NaOH 2 M (d)

In figure F, the four XRD patterns are similar indicating that the pH does not have a strong influence in the crystallinity of the hybrids. Only the hybrid synthesized at pH=13 shows a small decrease of the crystallinity. The narrow reflections that can be observed in the XRD pattern of the hybrid synthesized

in presence of NaOH are attributed to sodium nitrate, a by-product of the reaction between magnesium nitrate and sodium hydroxide.

## II. TGA results

*Table A : Experimental ratio of organic species in the hybrids according to TGA analysis. The theoretical value is 49.0 %*

| Condition of synthesis (duration, solvent, others)         | Organic moieties ratio (%) |
|------------------------------------------------------------|----------------------------|
| Hybrid, 5 days, in phenoxy-2-propanol                      | 75.5                       |
| Hybrid, 5 days, in ethanol                                 | 48.2                       |
| Hybrid, 1 day, in ethanol                                  | 47.8                       |
| Hybrid, 1 day, in ethanol, with 8 mL of NaOH 0.5 M (pH=9)  | 44.1                       |
| Hybrid, 1 day, in ethanol, with 4 mL of NaOH 1 M (pH=9)    | 44.9                       |
| Hybrid, 1 day, in ethanol, with 8 mL of NaOH 1 M (pH = 10) | 45.0                       |
| Hybrid, 1 day, in ethanol, with 8 mL of TPAOH 1 M (pH=10)  | 48.9                       |
| Hybrid, 1 day, in ethanol, with 8 mL of NaOH 2 M (pH=13)   | 40.4                       |
| Hybrid, 1 day, in ethanol, with 4 mL of water              | 47.8                       |
| Hybrid, 1 day, in ethanol, with 8 mL of water              | 45.9                       |
| Hybrid, 1 day, in ethanol, with 12 mL of water             | 45.0                       |

The hybrid synthesized in phenoxy-2-propanol presents a high organic ratio because, even after washing, some solvent remains in the material. The hybrid synthesized in presence of TPAOH also has a high ratio. This can be explained by the impurity present in the material that can be observed by XRD. All the others have got ratios below the theoretical value due to the carbonaceous residue remaining in the sample after TGA.
